# Supplementary material
Source: Springer Nature journal article supplement (https://www.springermedizin.de/resource/supplementary/12874_2005_150_MOESM3_ESM.pdf/9433874)
Supplement: MOESM3 [file 9433874]

Potentially relevant RCTs identified and screened for retrieval (n=625)

351 trials excluded, reasons:

- Effectiveness not reported in parameter of interest (n=118)
- Pharmaceutical not administered in dose of interest (n=118)
- No monotherapy (n=70)
- Baseline of parameter of interest not reported (n=27)
- No RCT (n=16)
- Pharmaceutical of interest not investigated (n=2)

RCTs considered for more detailed evaluation (n=274)

68 trials excluded, reasons:

- Study duration less than two weeks (n=23)
- Non-human or healthy subjects (n=20)
- Duplicate (n=11)
- Treatment in connection with eye surgery (n=7)
- Less than ten patients (n=4)
- No access to complete article (n=3)

RCTs included in meta-analysis (n=206)
